# Supplementary material
Source: publisher site journal article supplement (https://www.dovepress.com/article/556843)
Supplement: Supplementary file 1 [file Appendix 1.pdf › Appendix 1.pdf]

# CARSEAT Observer Tool

|   |                                   |  |
|---|-----------------------------------|--|
| C | Communication                     |  |
| A | Assessment                        |  |
| R | Rapport                           |  |
| S | Situational Awareness             |  |
| E | Escalation                        |  |
| A | Application of Clinical Knowledge |  |
| T | Teamwork                          |  |

# CARSEAT Observer Tool

|   |                                   |                                                                                                              |
|---|-----------------------------------|--------------------------------------------------------------------------------------------------------------|
| C | Communication                     | How was the communication between your colleague and the patient +/- relative?                               |
| A | Assessment                        | Was a thorough A-E assessment completed? Any areas missed?                                                   |
| R | Rapport                           | How was the rapport between your colleague and the patient +/- relatives?                                    |
| S | Situational Awareness             | What did you observe during the scenario that your colleague may have not noticed? Any general observations? |
| E | Escalation                        | Was the scenario escalated appropriately? Was SBAR utilized effectively?                                     |
| A | Application of Clinical Knowledge | How well did your colleague apply their knowledge to the scenario?                                           |
| T | Teamwork                          | How well did your colleague work with their colleagues?                                                      |
